# Supplementary material for: Synthetically accessible, tunable, low-molecular-weight oligopeptide organogelators
Source: Royal Society of Chemistry journal article supplement (doi:10.1039/c0cc01449d), 2010-08-25
Supplement: c0cc01449d.pdf [file c0cc01449d.pdf]

# Synthetically Accessible, Tunable, Low-Molecular-Weight Oligopeptide Organogelators

Cecile Lagadec<sup>a</sup> and David K. Smith<sup>\*,a</sup>

## SUPPLEMENTARY INFORMATION

### Contents

- 1 Sample Mass Spectrometric Analysis of Oligopeptides
- 2 SEM Imaging of Oligopeptide Xerogels
- 3 Experimental Procedures
  - 3.1 Synthetic Methods and Characterisation Data
  - 3.2 Mass Spectral Data
  - 3.3 Procedure for Making Gels
  - 3.4 Procedure for the measurement of  $T_{\text{gel}}$  values
  - 3.5. Procedure for the preparation of SEM samples
- 4 Other Initiators
- 5 References

## 1. Sample Mass Spectrometric Analysis of Oligopeptides

**Fig. S1.** ESMS of an oligolysine initiated by adventitious water, with  $m/z$  peaks for four, five, six, seven and eight lysine repeat units.

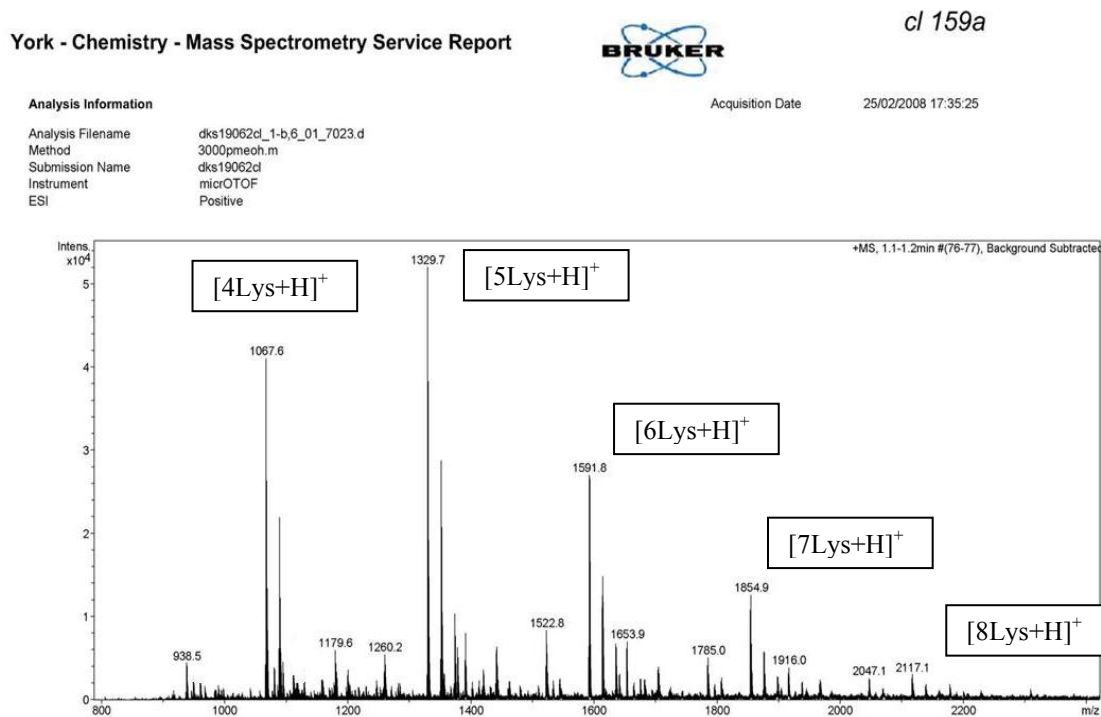

**Fig. S2.** ESMS of oligolysine attached to initiator **3**, with  $m/z$  peaks for four, five, six, seven and eight lysine repeat units attached to the amine on the initiator.

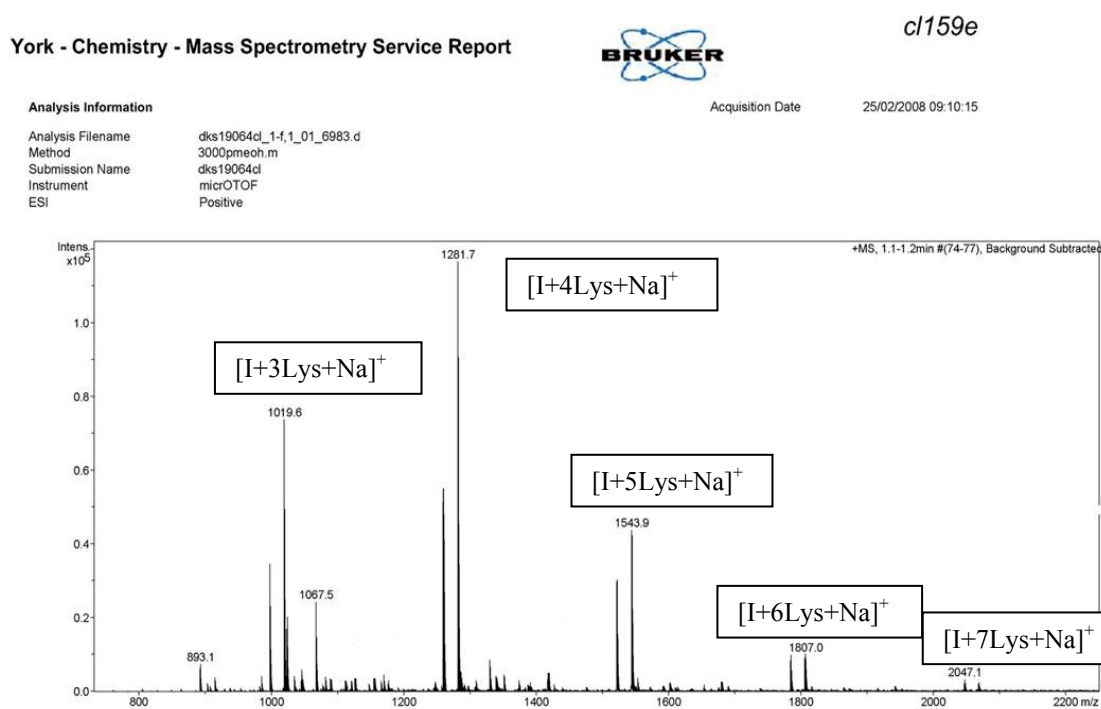

**Fig. S3.** ESMS of an oligolysine attached to initiator **4** (product **4-Lys-B**), oligomerised from a 1:4 mixture (initiator:lysine-NCA), with  $m/z$  peaks for two and three lysine repeat units attached to the initiator.

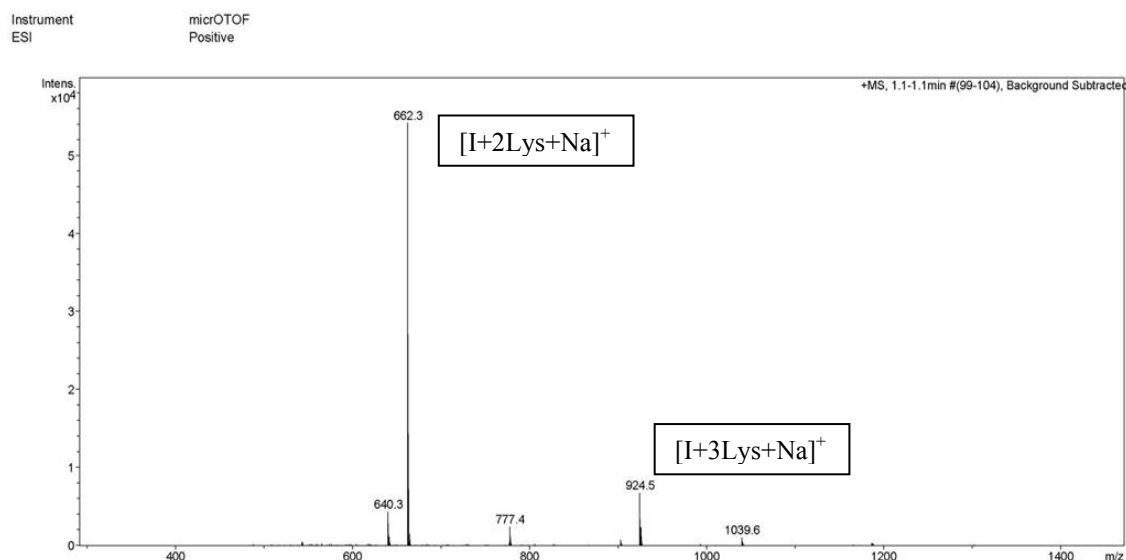

**Fig. S4.** ESMS of an oligolysine attached to initiator **4** (product **4-Lys-B**), oligomerised from a 1:10 mixture (initiator:lysine-NCA), demonstrating  $m/z$  peaks for two, three, four and five lysine repeat units attached to the initiator and some oligolysines initiated by adventitious water.

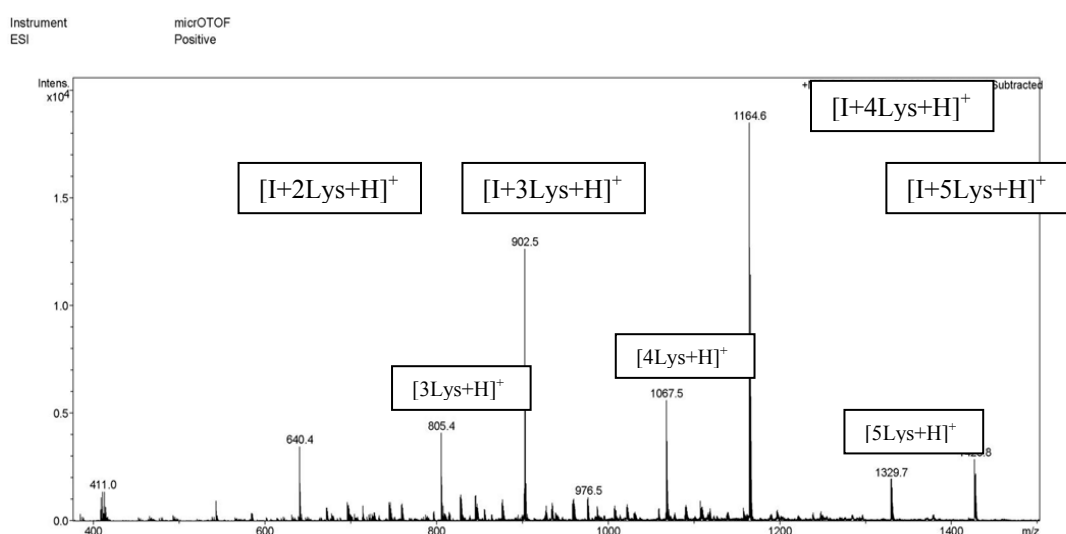

## 2. SEM Imaging of Oligopeptide Xerogels

**Fig S5.** SEM image of xerogel formed by compound **4-Lys-A** (15 mg) dried from 1,2-dichlorobenzene (0.5 mL).

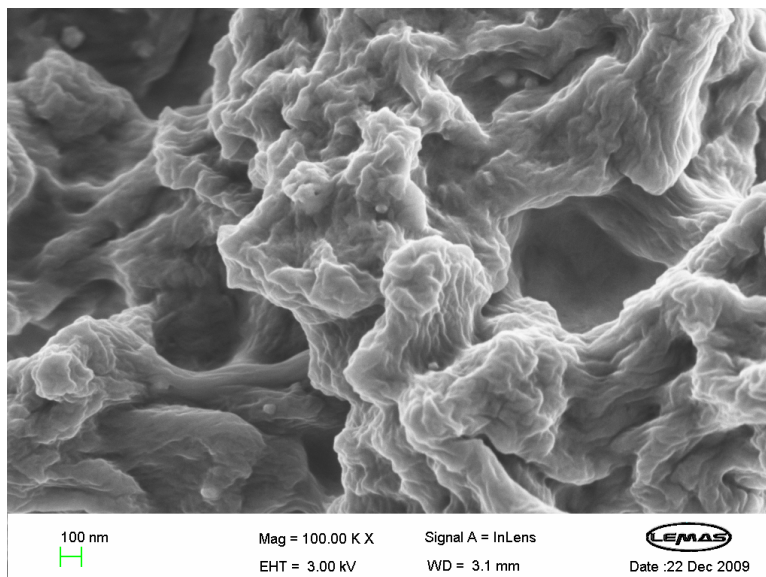

**Fig S6.** SEM image of xerogel formed by compound **4-Lys-A** (15 mg) dried from 1,2-dichlorobenzene (0.5 mL).

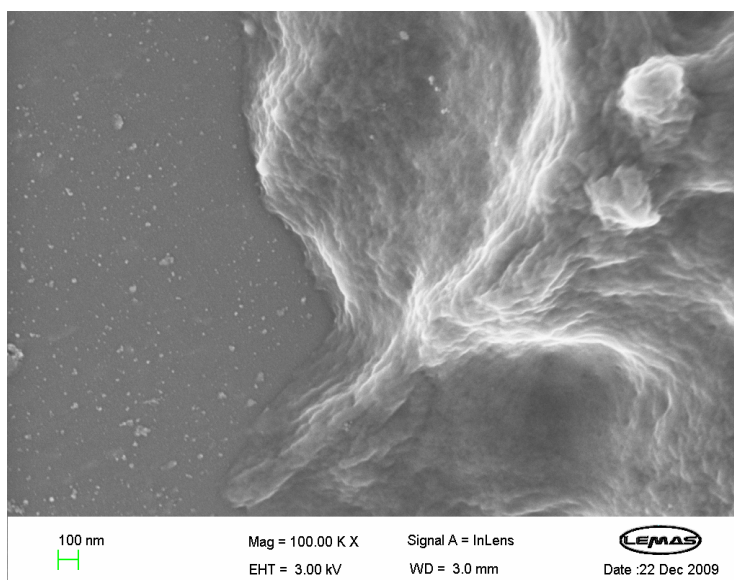

### 3 Experimental Procedures

### 3.1 Synthetic Methods and Characterisation Data

**Synthesis of  $N^\epsilon$ -benzyloxycarbonyl-L-lysine-N-carboxyanhydride.**<sup>1</sup>  $N^\epsilon$ -benzyloxycarbonyl-L-lysine (3.00 g, 10.68 mmol) was suspended in dry THF (50 mL) under an argon atmosphere over molecular sieves, and the temperature was increased to 55°C. Triphosgene (1.06 g, 3.56 mmol, caution – toxic) was dissolved in dry THF (5 mL) under argon atmosphere and added slowly to the reaction mixture. The reaction mixture was stirred at 60°C for 4 h, and then cooled to ambient temperature and a 10-fold excess of *n*-hexane was added to precipitate the product. The white compound **3.9** was obtained by filtration and dried under vacuum, with a 2.76 g yield (84%). <sup>1</sup>H NMR (DMSO-*d*<sub>6</sub>)  $\delta_{\text{H}}$  9.13 (1H, s,  $NH_{\alpha}$ ), 7.33 (6H, m,  $C_6H_5$ ), 7.33 (1H, s, NHZ), 4.99 (2H, s,  $CH_2C_6H_5$ ), 4.44-4.41 (1H, m,  $CH_{\alpha}$ ), 2.97 (2H, dd,  $CH_2NHZ$ ,  $J = 5.7$  Hz,  $J = 4$  Hz), 1.77-1.60 (2H, m,  $CH_{\alpha}CH_2$ ), 1.50-1.28 (4H, m,  $CH_2-CH_2$ ). <sup>13</sup>C NMR (DMSO-*d*<sub>6</sub>)  $\delta_{\text{C}}$  171.7 ( $CH_{\alpha}CO$ ), 156.1( $COOCH_2C_6H_5$ ), 152.0 (CONH), 137.3, 128.4, 127.7 ( $C_6H_5$ ), 65.1 ( $CH_2C_6H_5$ ), 57.0 ( $CH_{\alpha}$ ), 40.1 ( $CH_2NHZ$ ), 30.6, 28.8, 21.6 ( $CH_{\alpha}CH_2CH_2CH_2$ ). ESI-MS ( $m/z$ ) calc. for  $C_{15}H_{18}N_2NaO_5$  [ $M+Na$ ]<sup>+</sup> 329.1108; found 329.1109 (100%).

**General procedure for the ring opening polymerisation of  $N^\epsilon$ -carboxybenzyloxy-L-lysine N-carboxyanhydride.** The relevant initiator (0.272 mmol, 0.167 equiv) was placed in a dried flask and dried in the vacuum oven overnight. Gelators were then synthesized by adding the  $N^\epsilon$ -benzyloxycarbonyl-L-lysine N-carboxyanhydride (0.50 g, 1.63 mmol, 1 eq.) solubilised in extra dry DMF (10 mL) under argon atmosphere dropwise to a solution of the appropriate amine or diamine in dry DMF (20 mL) under an argon atmosphere. The mixture was stirred for 5 d at room temperature. The DMF was removed by vacuum distillation. The solid products were dissolved in a minimum of DMF and the desired products were precipitated by addition of diethyl ether. The products were obtained as white to beige powders which were easy to manipulate.

**Gelator 1-Lys<sub>n</sub>.** The general procedure was followed using octadecylamine as the amine. The product was obtained as a white solid in a yield of 383 mg (65 wt%). <sup>1</sup>H NMR (DMSO-*d*<sub>6</sub>)  $\delta_{\text{H}}$  8.26 (1H, br,  $NH_{\alpha}CO$ ), 8.08 (1H, br,  $NH_{\alpha}CO$ ), 7.96 (1H, br,

$\text{NH}_\alpha\text{CO}$ ), 7.79 (1H, br,  $\text{NH}_\alpha\text{CO}$ ), 7.33 (20H, s,  $\text{C}_6\text{H}_5$ ), 7.24 (4H, br,  $\text{NHZ}$ ), 4.99 (8H, s,  $\text{CH}_2\text{C}_6\text{H}_5$ ), 4.27-4.12 (4H, m,  $\text{CH}_\alpha$ ), 2.94 (8H, br,  $\text{CH}_2\text{Z}$ ), 1.63-1.51 (8H, m,  $\text{CH}_\alpha\text{CH}_2$ ), 1.47-1.16 (52H, m,  $\text{CH}_2$ ,  $\text{CH}_3$ ). ESI-MS ( $m/z$ ) calc. for  $\text{C}_{74}\text{H}_{111}\text{N}_9\text{NaO}_{12}$  (**1-Lys<sub>4</sub>**)  $[\text{M}+\text{Na}]^+$  1340.8244; found 1340.8195 (53%,  $[\text{M}+\text{Na}]^+$ ), 1318.8377 (42%,  $[\text{M}+\text{H}]^+$ ) – other mass spectral peaks were present – see Table S1.

**Gelator 2-Lys<sub>n</sub>.** The general procedure was followed using 4,4'-diaminodiphenylmethane as the diamine. The product was obtained as a beige solid in a yield of 343 mg (61 wt%).  $^1\text{H}$  NMR ( $\text{DMSO-}d_6$ )  $\delta_{\text{H}}$  8.33 (1H, br,  $\text{NH}_\alpha\text{CO}$ ), 7.96 (3H, br,  $\text{NH}_\alpha\text{CO}$ ), 7.27 (4H, d,  $\text{C}_6\text{H}_4$ ,  $J = 8.4$  Hz), 7.33 (20H, s,  $\text{C}_6\text{H}_5$ ), 7.24 (4H, br,  $\text{NHZ}$ ), 6.83 (4H, d,  $\text{C}_6\text{H}_4$ ,  $J = 8.4$  Hz), 4.99 (8H, s,  $\text{CH}_2\text{C}_6\text{H}_5$ ), 4.30-4.07 (4H, m,  $\text{CH}_\alpha$ ), 3.67 (2H, s,  $\text{CH}_2(\text{C}_6\text{H}_4)_2$ ), 2.94 (8H, br,  $\text{CH}_2\text{Z}$ ), 1.65-1.16 (24H, m,  $\text{CH}_2$ ). ESI-MS ( $m/z$ ) calc. for  $\text{C}_{69}\text{H}_{87}\text{N}_{10}\text{O}_{12}$  (**2-Lys<sub>4</sub>**)  $[\text{M}+\text{H}]^+$  1247.6499; found 1247.6478 (100%,  $[\text{M}+\text{H}]^+$ ), 1269.6322 (80%,  $[\text{M}+\text{Na}]^+$ ) – other mass spectral peaks were present – see Table S1.

**Gelator 3-Lys<sub>n</sub>.** The general procedure was followed using 4,4'-diaminodicyclohexylmethane as the diamine. The product was obtained as a white solid in a yield of 458 mg (80 wt%).  $^1\text{H}$  NMR ( $\text{DMSO-}d_6$ )  $\delta_{\text{H}}$  8.31 (2H, br,  $\text{NH}_\alpha\text{CO}$ ), 7.86 (2H, br,  $\text{NH}_\alpha\text{CO}$ ), 7.34 (20H, s,  $\text{C}_6\text{H}_5$ ), 7.24 (4H, br,  $\text{NHZ}$ ), 4.99 (8H, s,  $\text{CH}_2\text{C}_6\text{H}_5$ ), 4.28-4.17 (4H, m,  $\text{CH}_\alpha$ ), 3.65 (1H, br,  $\text{CHNH}$ ), 3.34 (1H, br,  $\text{CHNH}$ ), 2.95 (8H, br,  $\text{CH}_2\text{Z}$ ), 1.71-1.08 (24H, m,  $\text{CH}_2$ ,  $\text{C}_6\text{H}_{10}$ ). ESI-MS ( $m/z$ ) calc. for  $\text{C}_{69}\text{H}_{98}\text{N}_{10}\text{NaO}_{12}$  (**3-Lys<sub>4</sub>**)  $[\text{M}+\text{Na}]^+$  1281.7558; found 1281.7234 (100%,  $[\text{M}+\text{Na}]^+$ ), 1259.7429 (50%,  $[\text{M}+\text{H}]^+$ ) – other mass spectral peaks were present – see Table S1.

**Gelator 4-Lys<sub>n</sub>.** The general procedure was followed using *trans*-aminocyclohexanol as the amine. The product was obtained as a white solid in a yield of 413 mg (77 wt%).  $^1\text{H}$  NMR ( $\text{DMSO-}d_6$ )  $\delta_{\text{H}}$  7.96 (4H, br,  $\text{NH}_\alpha\text{CO}$ ), 7.34 (20H, s,  $\text{C}_6\text{H}_5$ ), 7.24 (4H, br,  $\text{NHZ}$ ), 4.99 (8H, s,  $\text{CH}_2\text{C}_6\text{H}_5$ ), 4.54 (1H, br,  $\text{CHNH}$ ), 4.27-4.19 (4H, m,  $\text{CH}_\alpha$ ), 3.45 (1H, br,  $\text{CHOH}$ ), 2.94 (8H, br,  $\text{CH}_2\text{Z}$ ), 1.76-1.14 (24H, m,  $\text{CH}_2$ ,  $\text{C}_6\text{H}_{10}$ ). ESI-MS ( $m/z$ ) calc. for  $\text{C}_{62}\text{H}_{85}\text{N}_9\text{NaO}_{13}$  (**4-Lys<sub>n</sub>**) requires  $[\text{M}+\text{Na}]^+$  1186.6159; found 1186.6166 (20%,  $[\text{M}+\text{Na}]^+$ ), 1164.6332 (12%,  $[\text{M}+\text{H}]^+$ ) – other mass spectral peaks were present – see Table S1.

**Gelator 5-Lys<sub>n</sub>.** The general procedure was followed using 1-(3-aminopropyl)-2-pyrrolidinone as the amine. The product was obtained as a white solid in a yield of 177 mg (32 wt%). <sup>1</sup>H NMR (DMSO-*d*<sub>6</sub>) δ<sub>H</sub> 8.09 (1H, br, NHCO), 7.91 (3H, br, NHCO), 7.33 (20H, s, C<sub>6</sub>H<sub>5</sub>), 7.23 (4H, br, NHZ), 4.99 (8H, s, CH<sub>2</sub>C<sub>6</sub>H<sub>5</sub>), 4.30 (1H, br, CH<sub>α</sub>), 4.20 (2H, br, CH<sub>α</sub>), 4.10 (2H, br, CH<sub>2</sub>NR<sub>2</sub>), 2.94 (8H, br, CH<sub>2</sub>Z), 1.60-1.18 (24H, m, CH<sub>2</sub>, C<sub>4</sub>H<sub>6</sub>NO). ESI-MS (*m/z*) calc. for C<sub>63</sub>H<sub>86</sub>N<sub>10</sub>NaO<sub>13</sub> (**5-Lys<sub>4</sub>**) [M+Na]<sup>+</sup> 1213.6268; found 1213.6279 (40%, [M+Na]<sup>+</sup>), 1191.6467 (12%, [M+Na]<sup>+</sup>).

**Gelator 6-Lys<sub>n</sub>.** The general procedure was followed using 4-(2-aminoethyl)morpholine as the amine. The product was obtained as a white solid in a yield of 389 mg (72 wt%). <sup>1</sup>H NMR (DMSO-*d*<sub>6</sub>) δ<sub>H</sub> 8.44 (1H, br, NHCO), 7.91 (3H, br, NHCO), 7.33 (20H, s, C<sub>6</sub>H<sub>5</sub>), 7.23 (4H, br, NHZ), 4.99 (8H, s, CH<sub>2</sub>C<sub>6</sub>H<sub>5</sub>), 4.30 (1H, br, CH<sub>α</sub>), 4.20 (2H, br, CH<sub>α</sub>), 4.10 (1H, br, CH<sub>α</sub>), 2.94 (8H, br, CH<sub>2</sub>Z), 1.60-1.20 (24H, m, CH<sub>2</sub>, C<sub>4</sub>H<sub>4</sub>NO). ESI-MS (*m/z*) calc. for C<sub>62</sub>H<sub>86</sub>N<sub>10</sub>O<sub>13</sub> (**6-Lys<sub>4</sub>**) requires [M+H]<sup>+</sup> 1179.41; found 1179.6 (4%, [M+H]<sup>+</sup>).

### 3.2 Mass Spectral Data

**Table S1.** Table of the composition of the mixtures obtained by ROP. Figures provided are *m/z* values, relative intensities are provided in brackets.

| Initiators                          |   | 1 | 2                               | 3                               | 4 | 5                                 | 6                                 |
|-------------------------------------|---|---|---------------------------------|---------------------------------|---|-----------------------------------|-----------------------------------|
| Oligolysines<br>(Lys <sub>n</sub> ) | 4 | - | 1067<br>(3.5x10 <sup>4</sup> )  | 1067<br>(0.22x10 <sup>5</sup> ) | - | 1067.5<br>(1.2x10 <sup>4</sup> )  | 1067.5<br>(5.8 x10 <sup>4</sup> ) |
|                                     | 5 | - | 1329<br>(3.5 x10 <sup>4</sup> ) | -                               | - | 1329.7<br>(1.2 x10 <sup>4</sup> ) | 1329.7<br>(6.6 x10 <sup>4</sup> ) |
|                                     | 6 | - | 1591<br>(1.6x10 <sup>4</sup> )  | -                               | - | 1591.9<br>(0.8 x10 <sup>4</sup> ) | 1591.8<br>(3.6 x10 <sup>4</sup> ) |
|                                     | 7 | - | 1854<br>(0.5x10 <sup>4</sup> )  | -                               | - | 1875.9<br>(0.2 x10 <sup>4</sup> ) | 1854.9<br>(1.6 x10 <sup>4</sup> ) |
|                                     | 8 | - | -                               | -                               | - | -                                 | 2117.1<br>(0.4 x10 <sup>4</sup> ) |

|                                                       |   |                                   |                                |                                    |                                   |                                   |                                   |
|-------------------------------------------------------|---|-----------------------------------|--------------------------------|------------------------------------|-----------------------------------|-----------------------------------|-----------------------------------|
| Lysine attached to initiator<br>(I-Lys <sub>n</sub> ) | 2 | 816.6<br>(1.8x10 <sup>5</sup> )   | -                              | -                                  | 662.4<br>(1x10 <sup>5</sup> )     | 689.4<br>(7.5 x10 <sup>4</sup> )  | 917.4<br>(0.6 x10 <sup>4</sup> )  |
|                                                       | 3 | 1078.7<br>(1.7x10 <sup>5</sup> )  | 985.5<br>(6x10 <sup>4</sup> )  | 1019.6<br>(0.7 x10 <sup>5</sup> )  | 924.5<br>(0.6 x10 <sup>5</sup> )  | 951.5<br>(5.5 x10 <sup>4</sup> )  | 1179.6<br>(0.6 x10 <sup>4</sup> ) |
|                                                       | 4 | 1340.8<br>(0.95x10 <sup>5</sup> ) | 1247.6<br>(9x10 <sup>4</sup> ) | 1281.7<br>(1.2x10 <sup>5</sup> )   | 1186.6<br>(0.2x10 <sup>5</sup> )  | 1213.6<br>(3 x10 <sup>4</sup> )   | 1441.7<br>(0.25x10 <sup>4</sup> ) |
|                                                       | 5 | 1582.0<br>(0.22x10 <sup>5</sup> ) | 1510<br>(5x10 <sup>4</sup> )   | 1543.9<br>(0.4x10 <sup>5</sup> )   | 1449.7<br>(0.05x10 <sup>5</sup> ) | 1475.8<br>(1x10 <sup>4</sup> )    | 1704.8<br>(0.15x10 <sup>4</sup> ) |
|                                                       | 6 | 1844.1<br>(0.8x10 <sup>5</sup> )  | 1772<br>(2x10 <sup>4</sup> )   | 1807.0<br>(1. ? x10 <sup>5</sup> ) | -                                 | 1737.9<br>(0.25x10 <sup>4</sup> ) | 1966.9<br>(0.1 x10 <sup>4</sup> ) |
|                                                       | 7 | -                                 | 2035<br>(1x10 <sup>4</sup> )   | 2047<br>(0.5x10 <sup>5</sup> )     | -                                 | 2001.0<br>(0.2 x10 <sup>4</sup> ) | -                                 |
|                                                       | 8 | -                                 | 2297<br>(0.5x10 <sup>4</sup> ) | -                                  | -                                 | 2263.1<br>(0.05x10 <sup>4</sup> ) | -                                 |

### 3.3 Procedure for Making Gels

An accurately measured mass of gelator was weighed out into a 2 ml glass vial. The solvent (0.5 ml) was then added using a Gilson pipette. The sample was sonicated for 30 minutes and heated with a heat gun until a homogeneous solution had been obtained which was then left to cool down. All gels were left over night to set.



### **3.4 Procedure for the Measurement of $T_{\text{gel}}$ Values**

Once the gel as formed, in a 2 mL glass sample vial, it was placed into a high precision thermoregulated oil bath and the temperature was increased at the rate of  $0.5^{\circ}\text{C}\cdot\text{min}^{-1}$ . The temperature at which solvent started to leach from the sample was recorded as the  $T_{\text{gel}}$  value, which reflects the onset temperature of the gel-sol transition.

### **3.5 Procedure for the Preparation of SEM Samples**

A small amount of gel sample was removed from its glass vial with a spatula and it was spread thinly onto an aluminum stub and left to dry overnight under ambient conditions in a fume hood. Before imaging, the sample was covered in a thin layer (4 nm) of Pd/Pt using an Agar sputter coater before being placed in the microscope.

## 4 Other Initiators

Ring opening polymerisation was also investigated with initiators **7-10**.

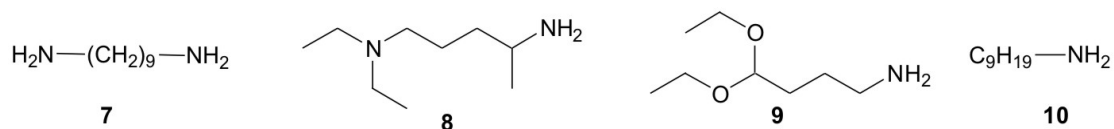

Initiators **9** and **10** gave products that could not be precipitated – presumably indicating ineffective oligomerisation. ESMS of the crude solid products formed from initiators **7** and **8** showed that these initiators did not form **I-Lys<sub>n</sub>** but instead only had ESMS peaks for unattached oligo-lysine (**Lys<sub>n</sub>**) – oligomerisation was initiated with adventitious water, possibly because these initiators were difficult to dry fully.

## 5 References

1. J. Lee, S.-J. Lee, J.-Y. Choi, J. Y. Yoo and C.-H. Ahn, *Eur. J. Pharm. Sci.* **2005**, *24*, 441.
